# Supplementary material for: The role of oxophilic Mo species in Pt/MgO catalysts as extremely active sites for enhanced hydrodeoxygenation of dibenzofuran
Source: Royal Society of Chemistry journal article supplement (doi:10.1039/d0cy00341g), 2020-01-01
Supplement: d0cy00341g1.pdf [file d0cy00341g1.pdf]

## Supporting information

### **The role of oxophilic Mo species in Pt/MgO catalyst as extremely active sites for enhanced hydrodeoxygenation of dibenzofuran**

Jie Zhang <sup>a</sup>, Chengcheng Zhao <sup>b</sup>, Chuang Li <sup>a</sup>, Shenggang Li <sup>b</sup>, Chi-Wing Tsang <sup>c</sup>,  
Changhai Liang <sup>a,\*</sup>

<sup>a</sup> State Key Laboratory of Fine Chemicals, Laboratory of Advanced Materials and Catalytic Engineering, School of Chemical Engineering, Dalian University of Technology, Dalian 116023, China

<sup>b</sup> CAS Key Laboratory of Low-Carbon Conversion Science and Engineering, Shanghai Advanced Research Institute, Chinese Academy of Sciences, Shanghai 201203, PR China

<sup>c</sup> Faculty of Science and Technology, Technological and Higher Education Institute of Hong Kong, Hong Kong, China

\* To whom correspondence should be addressed: Fax: + 86-411-84986353; E-mail: [changhai@dlut.edu.cn](mailto:changhai@dlut.edu.cn); Homepage: <http://amce.dlut.edu.cn>

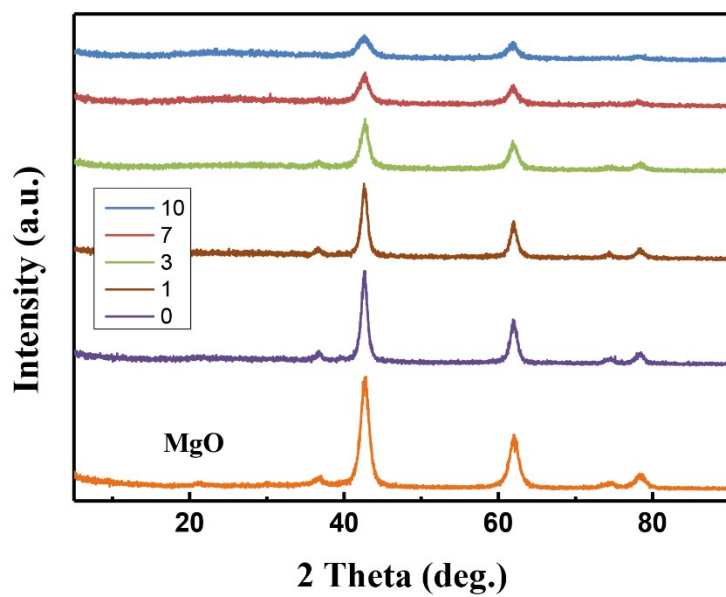

**Fig. S1** XRD diffraction patterns for the Pt/nMoO<sub>x</sub>/MgO (n = 0, 1, 3, 7, 10) catalysts reduced at 400 °C for 2 h under H<sub>2</sub> flow.

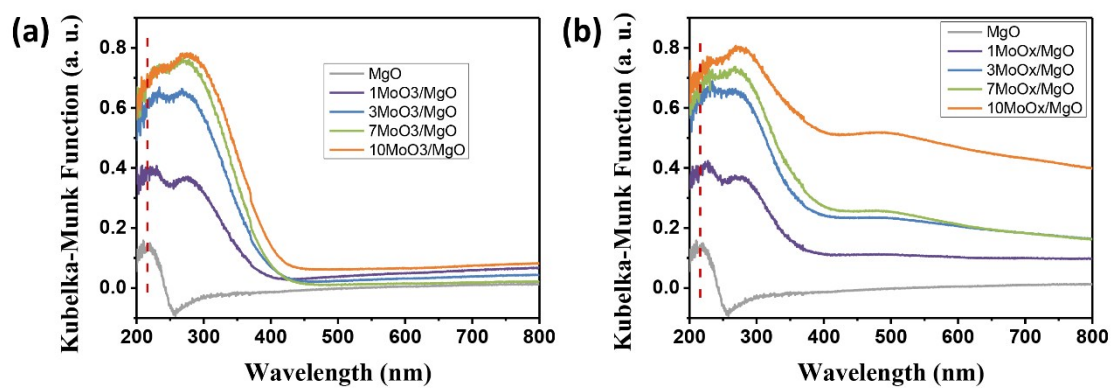

**Fig. S2** The UV-vis DRS spectra of the MoO<sub>x</sub>/MgO supports at oxidation states (a) and reduction states (b).

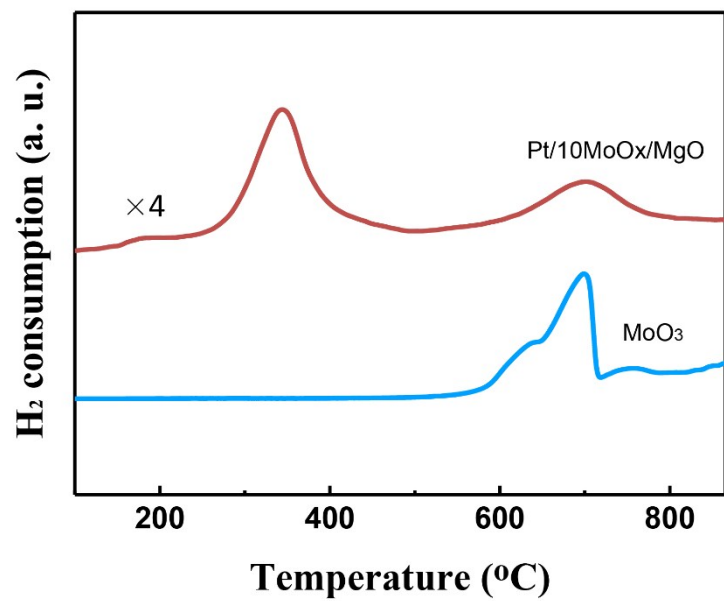

Fig. S3 H<sub>2</sub>-TPR of calcined Pt/10MoO<sub>x</sub>/MgO and MoO<sub>3</sub>.

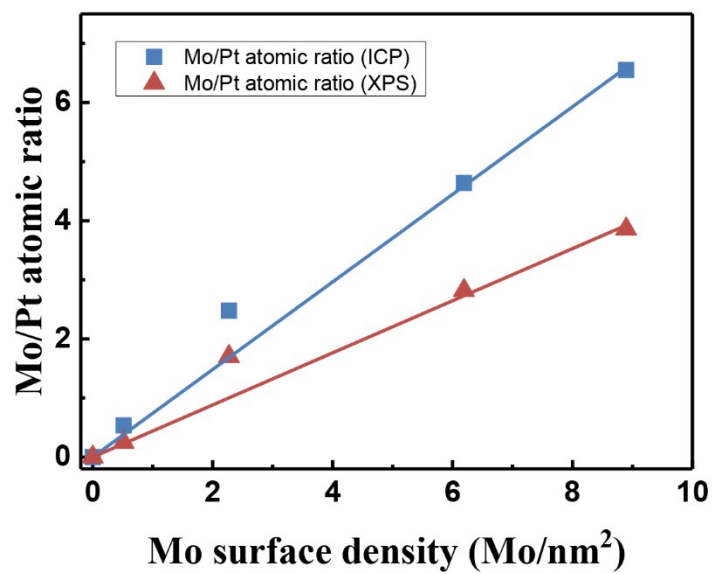

**Fig. S4** The Mo/Pt atomic ratios determined by ICP and XPS as a function of the Mo surface density of catalysts.

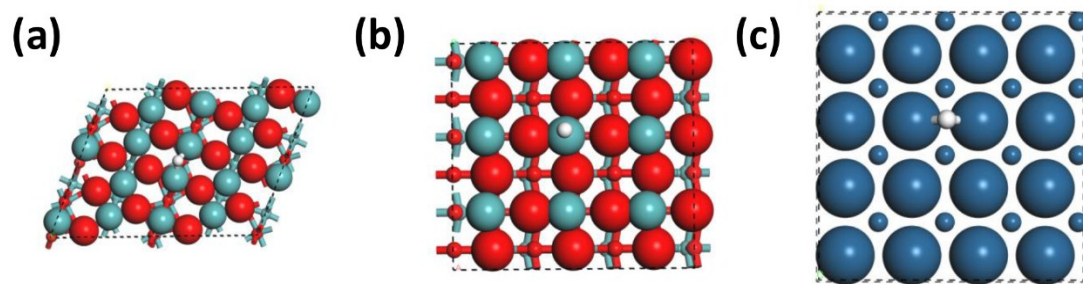

**Fig. S5** Adsorption configurations of hydrogen on (a)  $\text{MoO}_2$  (011), (b)  $\text{MoO}_3$  (010) and (c) Pt (100) surfaces, respectively.

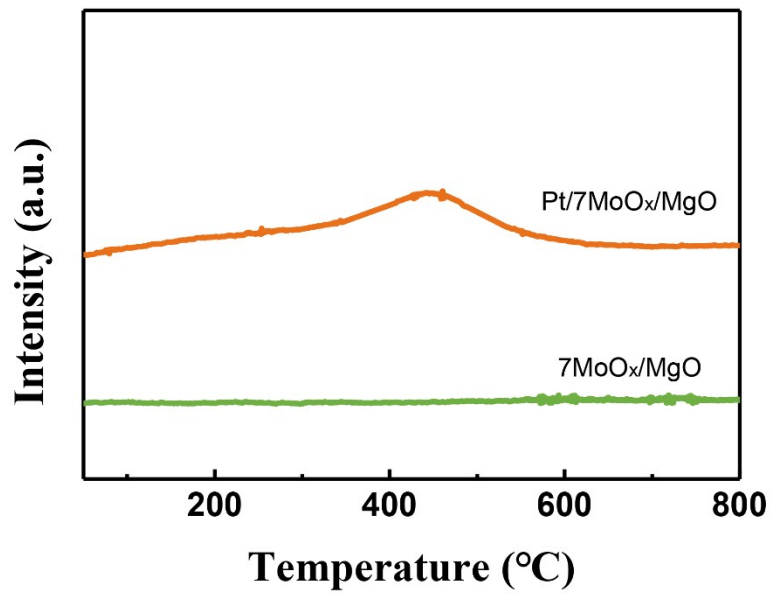

Fig. S6 H<sub>2</sub>-TPD of Pt/7MoO<sub>x</sub>/MgO and 7MoO<sub>x</sub>/MgO catalysts.
